# Supplementary material
Source: PubMed Central journal article supplement (PMC2613769)
Supplement: NIHMS82672-supplement-01.pdf [file NIHMS82672-supplement-01.pdf]

Supplementary Table 1: Primers for site directed mutagenesis and cloning

| Construct         | Primers (Forward Primers are listed first)                                                              |
|-------------------|---------------------------------------------------------------------------------------------------------|
| B2-2, 3           | 5'-(TAATACGACTCACTATAGG)CATCAGACTAATTGCACTTTTAACG-3'<br>5'-GTTTTATTTCCAAACATA-3'                        |
| B2-2-5            | 5'-(TAATACGACTCACTATAGG)CATCAGACTAATTGCACTTTTAACG-3'<br>5'-GTTTTATTTTCATACTGAC-3'                       |
| B2-2,3,6          | 5'-GCTGCTGTTCCCTGTAAATATGTTTGGAAATAAACTTCAC-3'<br>5'-GTGAAGTTTTATTTCCAAACATATTTACAGGAACAGCAGC-3'        |
| CPE4 <sup>-</sup> | 5'-GCTGTTCCCTGTAAATATGTTTGGACTCATTTGTGAACTTTGAG-3'<br>5'-CTCAAAGTTCACAAATGAGTCCAAACATATTTACAGGAACAGC-3' |
| CPE6 <sup>-</sup> | 5'-GTCAGTATGAAATAAACTTCACGGATCCCCATTATTAT-3' 5'-<br>ATAATAATGGGGATCCGTGAAGTTTTATTTTCATACTGAC-3'         |
| pCS2-MT-AUF1      | 5'-CATGCCATGGTTTCTGAAGAAGACGACGAAGCCATG-3'<br>5'-CCGGAATTCTTAGTATGGTTTGTAACATTTTGATG-3'                 |
| AUF1 ORF          | 5'-GTTCTCTCTGTCTGCCTTATT-3'<br>5'-TGTGAATTGAATAATTTAGTATGGTTTGTAAC-3'                                   |
